# Supplementary material for: The mechanism of ligand-induced chiral transmission through a top-down selective domain etching process
Source: Royal Society of Chemistry journal article supplement (doi:10.1039/d2qm00075j), 2022-01-01
Supplement: d2qm00075j1.pdf [file d2qm00075j1.pdf]

## Mechanism of Ligand-Induced Chiral Transmission Through a Top-Down Selective Domain Etching

Junjie Hao,<sup>1,2#</sup> Junzi Li,<sup>3#</sup> Meijuan Chen,<sup>2,4</sup> Xijian Duan,<sup>2,5,6</sup> Bing Xu,<sup>6</sup> Yiwen Li,<sup>4</sup> Tingchao He,<sup>3\*</sup>  
Xiao Wei Sun,<sup>2,5,6\*</sup> Marie-Hélène Delville,<sup>1\*</sup> Jiaji Cheng<sup>4\*</sup>

<sup>1</sup> CNRS, Univ. Bordeaux, Bordeaux INP, ICMCB, UMR 5026, Pessac, F-33608, France;

<sup>2</sup> Key Laboratory of Energy Conversion and Storage Technologies (Southern University of Science and Technology), Ministry of Education, Shenzhen 518055, China;

<sup>3</sup> College of Physics and Optoelectronic Engineering, Shenzhen University, Shenzhen, Guangdong 518060, China;

<sup>4</sup> School of Materials Science and Engineering, Hubei University, Wuhan, Hubei 430062, China;

<sup>5</sup> Guangdong University Key Laboratory for Advanced Quantum Dot Displays and Lighting, Guangdong-Hong Kong-Macao Joint Laboratory for Photonic-Thermal-Electrical Energy Materials and Devices, Shenzhen Key Laboratory for Advanced Quantum Dot Displays and Lighting, SUSTech-HUAWEI Joint Lab for Photonics Industry, and Department of Electrical and Electronic Engineering, Southern University of Science and Technology, Shenzhen 518055, China;

<sup>6</sup> Shenzhen Planck Innovation Technologies Co. Ltd., Shenzhen 518055, China.

# These authors contributed equally to this work.

Email: [jiajicheng@hubu.edu.cn](mailto:jiajicheng@hubu.edu.cn); [marie-helene.delville@icmcb.cnrs.fr](mailto:marie-helene.delville@icmcb.cnrs.fr);  
[sunxw@sustech.edu.cn](mailto:sunxw@sustech.edu.cn); [tche@szu.edu.cn](mailto:tche@szu.edu.cn)

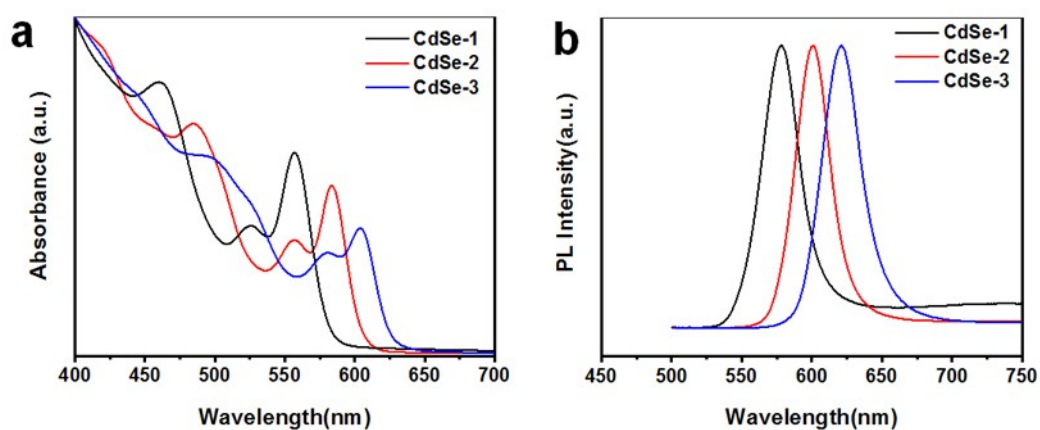

Figure S1. UV-vis. and PL of the different CdSe cores for the control synthesis of DRs.

Table S1. Physical properties of different CdSe cores.

| Name   | Abs (nm) | Diameter (nm) <sup>a</sup> | PL (nm) | FWHM (nm) |
|--------|----------|----------------------------|---------|-----------|
| CdSe-1 | 557      | 3.2                        | 578     | 33        |
| CdSe-2 | 583      | 3.9                        | 601     | 30        |
| CdSe-3 | 603      | 4.7                        | 619     | 32        |

<sup>a</sup> Diameter of the CdSe core is determined from the absorption spectrum by Peng's equation (nm).<sup>1</sup>

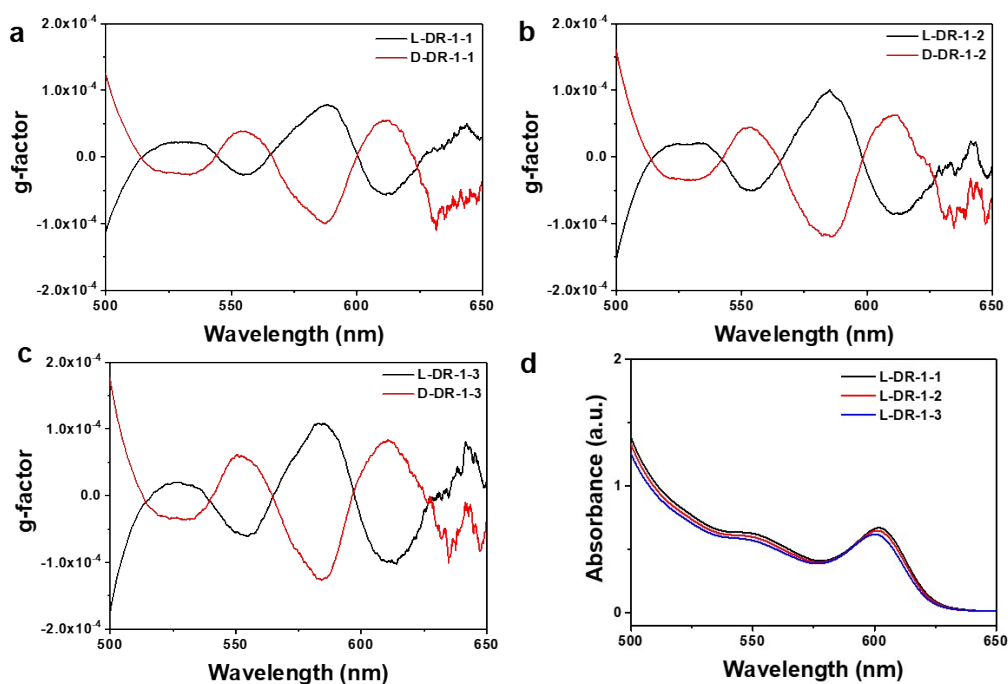

Figure S2. Corresponding  $g$ -factors variations and UV-vis. spectra of DR-1- $n$  ( $n = 1-3$ ) at the first exciton absorption peak as shown in Figure 4. a) CD spectrum of benzylamine modified DRs-1-1 after Cys exchange; b) CD spectrum of DRs-1-2 after one etching cycle and Cys exchange; c) CD spectrum of DRs-1-3 after two etching cycles and Cys exchange; d) Corresponding UV-vis. absorption spectra of the different etching processes.

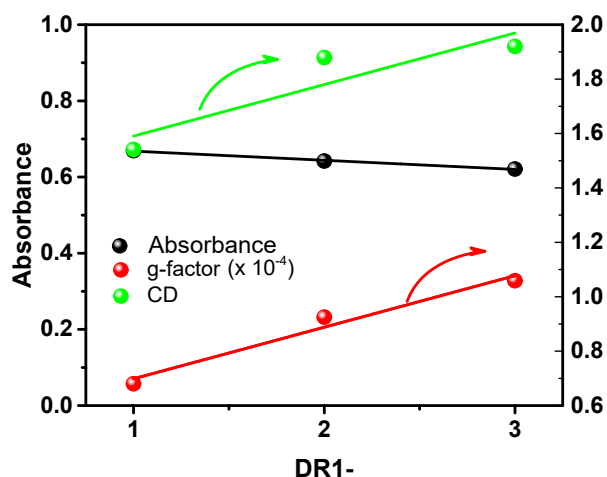

Figure S3. CD, UV-vis. and  $g$ -factor variations of L-Cys-DR-1-3 ( $n = 1-3$ ) at the first exciton absorption peak during the etching process. The UV-vis. value was taken at the maximum at the first exciton absorption peak.

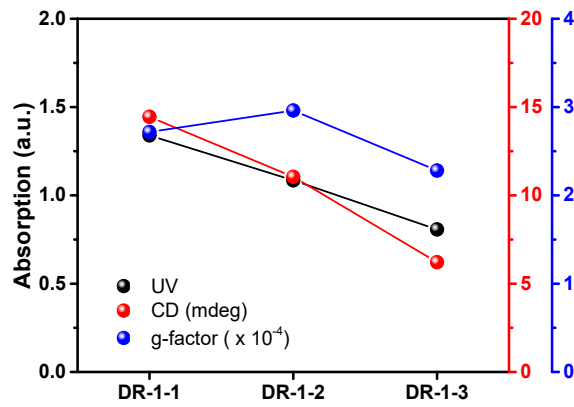

Figure S4. CD, UV-vis. and g-factor evolution of L-Cys-DR-1 (< 500 nm) during the etching process. The UV-vis. value is the wavelength of the maximum value of the CD signal.

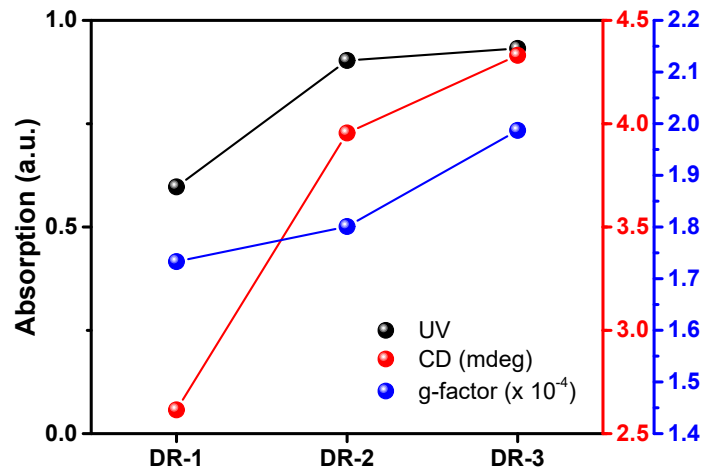

Figure S5. CD, UV-vis. and g-factor variations of L-Cys-DRs with different shell thicknesses at the first exciton absorption peak. The UV-vis. value is the maximum value at the first exciton absorption peak.

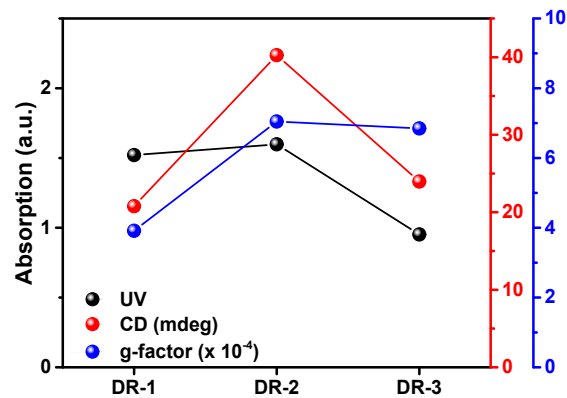

Figure S6. CD, UV-vis. and g-factor variations of L-Cys-DRs with different shell thicknesses (< 500 nm). The UV-vis. value is the wavelength of the maximum value of the CD signal.

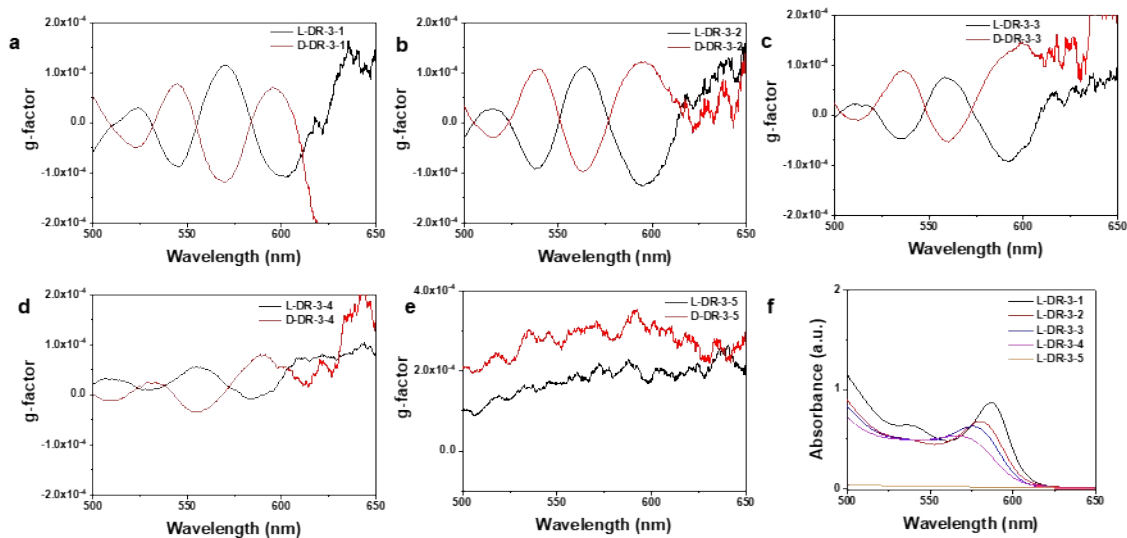

Figure S7. Corresponding UV-vis. and g-factor variations of DR-3 at the first exciton absorption peak as shown in Figure 8. (a) CD spectrum of benzyl amine-modified DRs after Cys exchange, (b)-(e) CD spectra of DRs with one cycle to four etching cycles after Cys exchange, (f) Corresponding UV-vis. absorptions of the different etching processes.

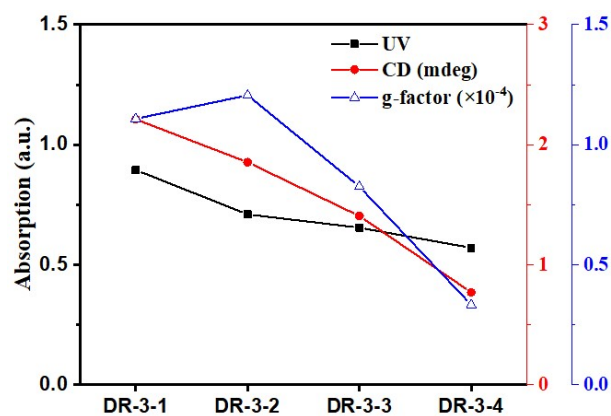

Figure S8. CD, UV-vis. and g-factor variations of L-Cys-DR-3-n (n = 1-4) at the first exciton absorption peak during the etching process. The UV-vis. value is the maximum value at the first exciton absorption peak.

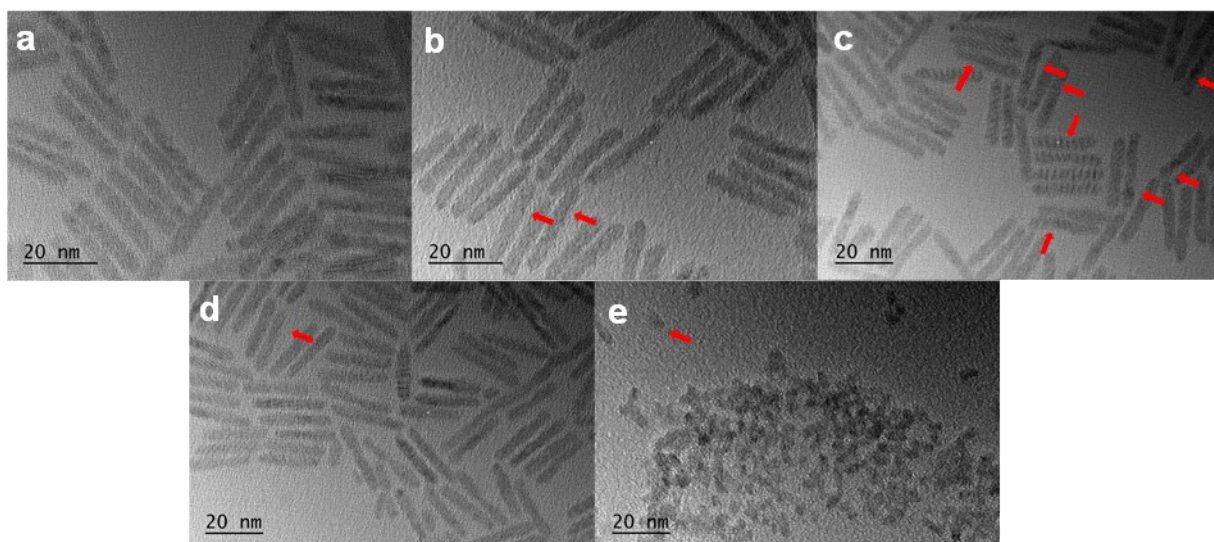

Figure S9. TEM images of DR-3 after the etching process. a) TEM of benzylamine modified DRs; b)-e) TEM of DRs after one cycle to four etching cycles.

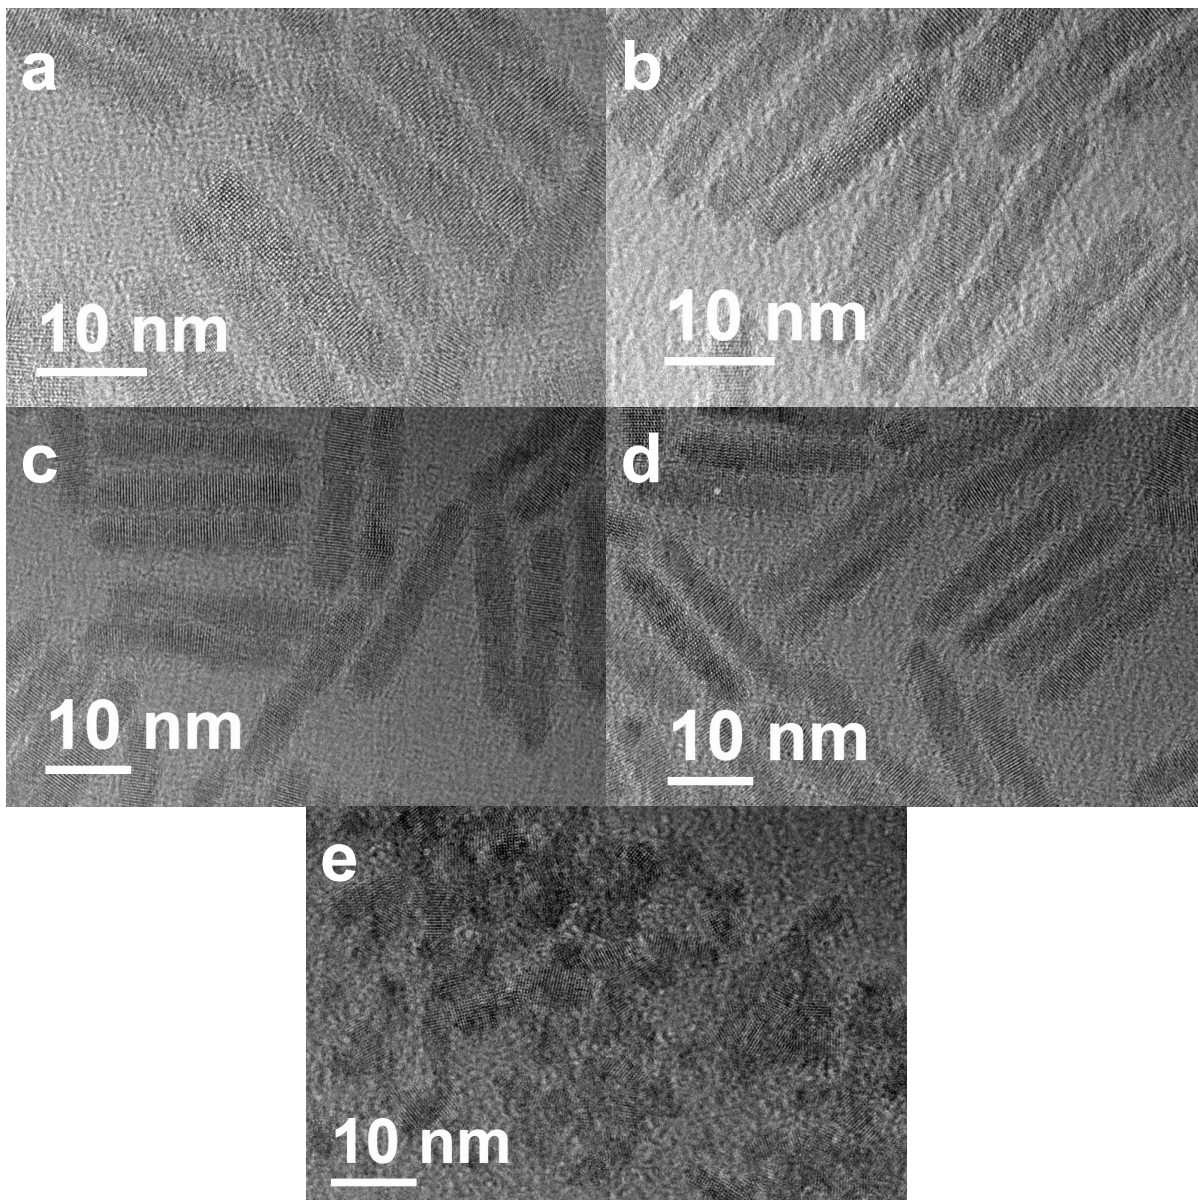

Figure S10. The HRTEM images corresponding to Figure 9. a) HRTEM of benzylamine modified DRs; b)-e) HRTEM of DRs after one cycle to four etching cycles.

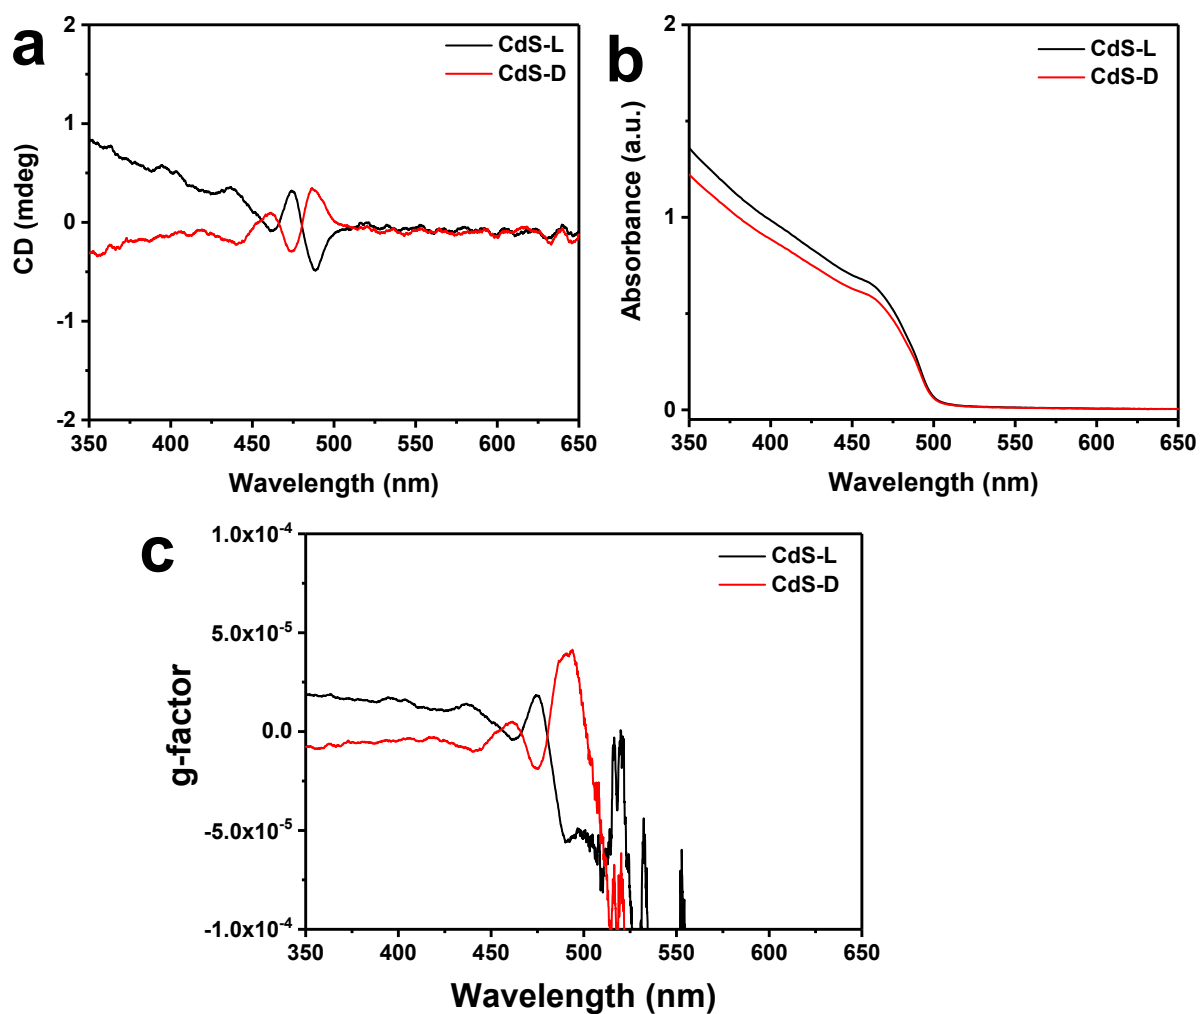

Figure S11. a) The CD spectrum of CdS-only nanorods after Cys exchange; b) the Corresponding UV-vis. absorptions of L-/D-CdS-only nanorods; c) the corresponding g-factor L-/D-CdS-only nanorods. The  $g_{CD}$  factor, defined as  $|g_{CD+} - g_{CD-}|/2$ , are  $3.72 \times 10^{-5}$  and  $3.00 \times 10^{-5}$  for L- and D-CdS-only nanorods, respectively.



Table S2. CD and g-factor of L-Cys-DR-3 at the first exciton absorption peak during the etching process.

| Name   | UV-vis (nm) | CD <sup>+</sup> /λ <sub>CD</sub> <sup>a</sup> | CD <sup>-</sup> /λ <sub>CD</sub> <sup>b</sup> | CD <sup>+</sup> - CD <sup>-</sup>   2 <sup>c</sup> | g <sub>CD+</sub> /λ <sub>CD</sub> <sup>d</sup> | g <sub>CD-</sub> /λ <sub>CD</sub> <sup>e</sup> | g <sub>CD+</sub> - g <sub>CD-</sub>   2 <sup>f</sup> |
|--------|-------------|-----------------------------------------------|-----------------------------------------------|----------------------------------------------------|------------------------------------------------|------------------------------------------------|------------------------------------------------------|
| DR-3-1 | 586.8       | 2.251/572.0                                   | -2.170/593.6                                  | 2.211                                              | 1.161/569.2                                    | -1.055/599.4                                   | 1.108                                                |
| DR-3-2 | 580.2       | 1.991/565.0                                   | -2.093/589.6                                  | 1.853                                              | 1.135/563.4                                    | -1.276/595.0                                   | 1.206                                                |
| DR-3-3 | 575.0       | 1.402/558.0                                   | -1.412/586.6                                  | 1.407                                              | 0.735/559.4                                    | -0.915/591.6                                   | 0.825                                                |
| DR-3-4 | 568.8       | 1.354/555.0                                   | -0.185/582.2                                  | 0.770                                              | 0.566/554.8                                    | -0.099/583.0                                   | 0.333                                                |
| DR-3-5 | /           | /                                             | /                                             | /                                                  | /                                              | /                                              | /                                                    |

<sup>a, b</sup> CD anisotropy at the most intense positive and negative CD bands (mdeg/nm), <sup>c</sup> magnitude of the CD signal, defined as |CD<sup>+</sup> - CD<sup>-</sup>||2, <sup>d, e</sup> CD anisotropy g<sub>CD</sub>-factors at the most intense positive and negative CD bands (10<sup>-4</sup>/nm), <sup>f</sup> magnitude of the g<sub>CD</sub> factor, defined as |g<sub>CD+</sub> - g<sub>CD-</sub>||2.

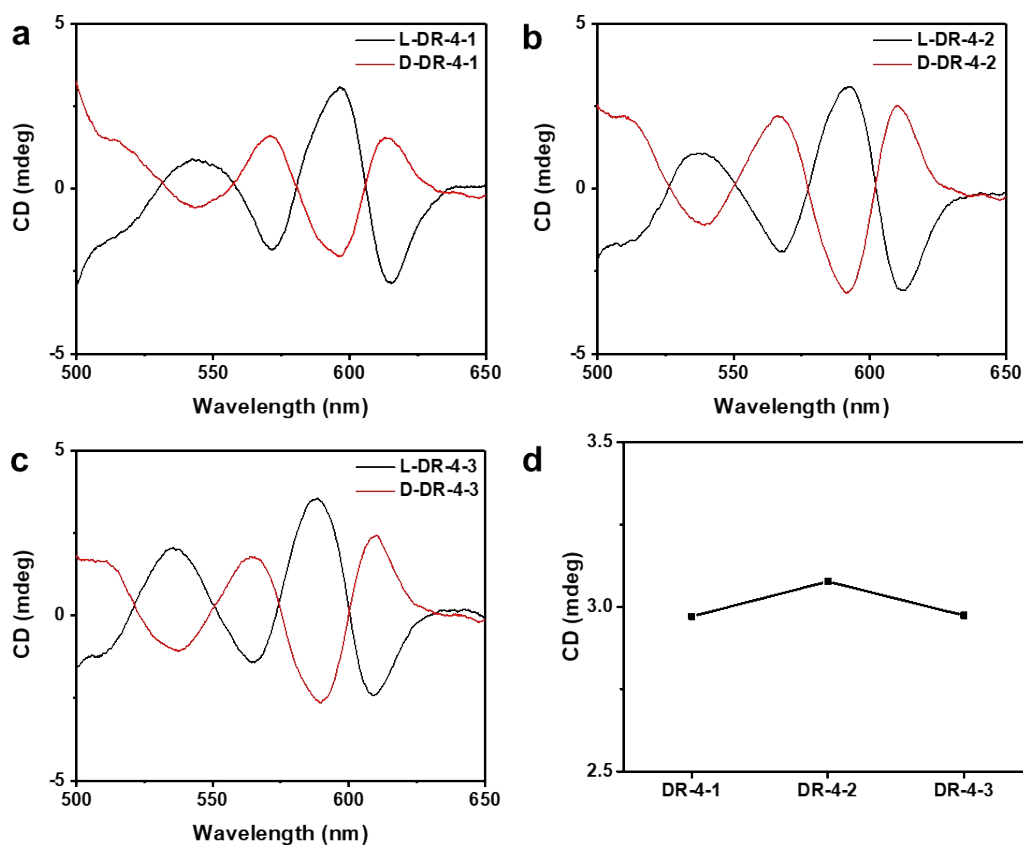

Figure S12. CD spectrum variations of DR-4-n (n =1-3) at the first exciton absorption peak during the etching process. a) CD spectrum of benzyl amine-modified DRs after the Cys exchange, b-c) CD spectra of DRs after one and two etching cycles and Cys exchange, d) CD signal evolution of L-Cys-DR-4-n (n =1-3) at the first exciton absorption peak during the etching process.

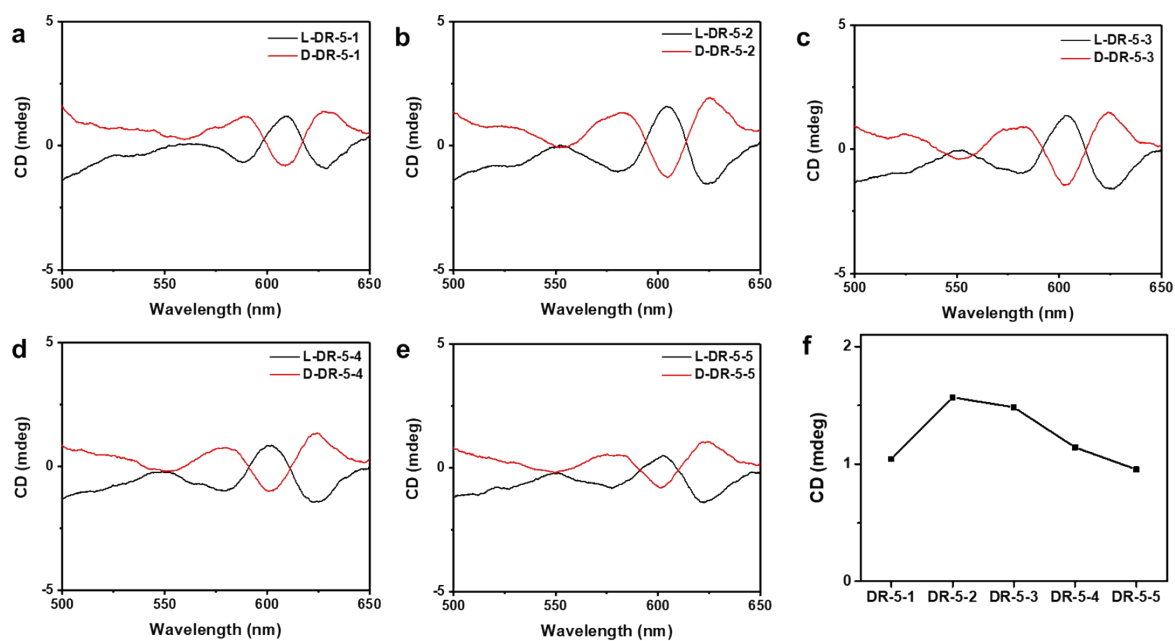

Figure S13. CD spectrum variations of DR-5-n ( $n = 1-5$ ) at the first exciton absorption peak during the etching process. a) CD spectrum of benzyl amine-modified DRs after the Cys exchange, b-e) CD spectra of DRs after one cycle to four etching cycles and Cys exchange, f) CD signal variation of L-Cys-DR-5-n ( $n = 1-5$ ) at the first exciton absorption peak during the etching process.

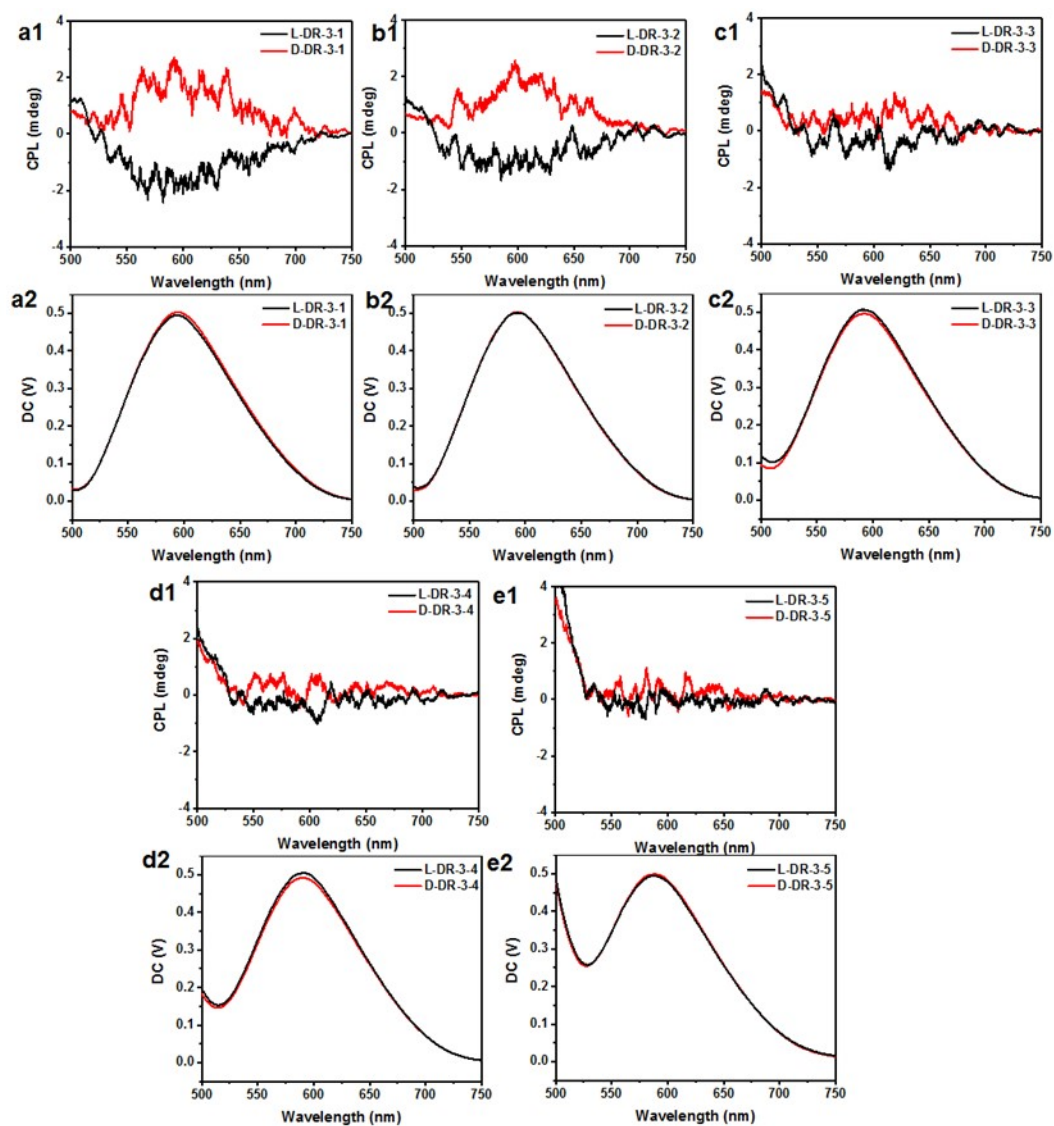

Figure S14. CPL variation of DR-3- $n$  ( $n = 1-5$ ) during the etching process. a1) CPL of benzyl amine-modified DRs after Cys exchange; b1-e1) CPL of DRs after one to four etching cycles and Cys exchange. a2-e2) Corresponding DC in volts, which stands for fluorescence intensity.

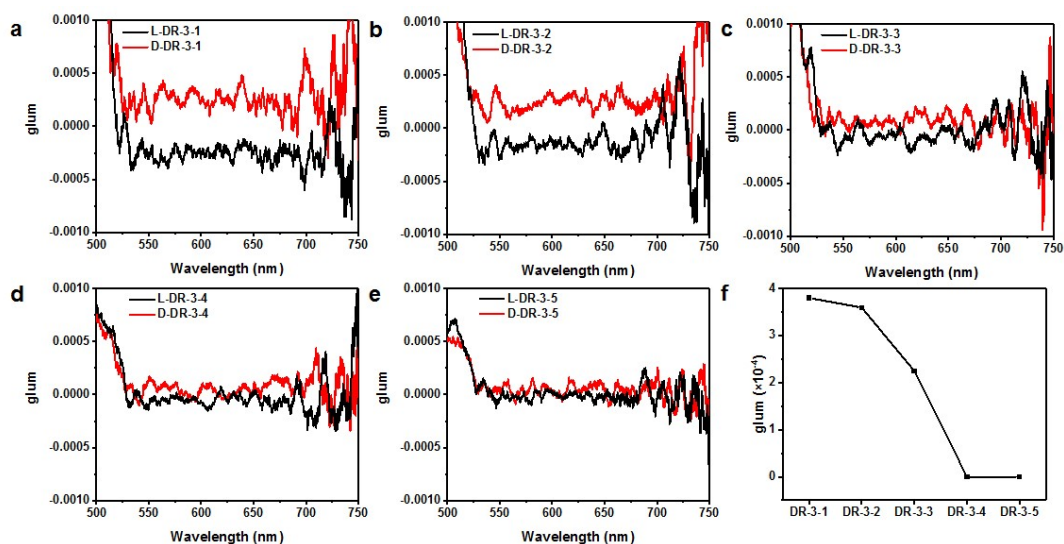

Figure S15. The corresponding  $g_{lum}$  variation of DR-3- $n$  ( $n = 1-5$ ), as shown in Figure S11. (a) The  $g_{lum}$  of benzyl amine-modified DRs after Cys exchange; (b)-(e) the  $g_{lum}$  of DRs after one to four etching cycles and Cys exchange; (f) the  $g_{lum}$  variation of L-Cys-DR-3 during the etching process.

1. W. W. Yu, L. Qu, W. Guo and X. Peng, Experimental Determination of the Extinction Coefficient of CdTe, CdSe, and CdS Nanocrystals, *Chem. Mater.*, 2003, **15**, 2854-2860.
